# Supplementary material
Source: Research Square preprint supplement (doi:10.21203/rs.3.rs-9144914/v1)

**Content**

**Supplementary Table 1**. Trends in Congenital Heart Disease Related Mortality Stratified by Place of Death in the United States, 1999 to 2020

**Supplementary Table 2.** Overall and Sex‐Stratified Congenital Heart Disease Related Age-Adjusted Mortality Rates per 100,000 in the United States, 1999 to 2019

**Supplementary Table 3.** Congenital Heart Disease Related Age-Adjusted Mortality Rates per 100,000, Stratified by Race in the United States, 1999 to 2019

**Supplementary Table 4.** Congenital Heart Disease Related Age-Adjusted Mortality Rates per 100,000, Stratified by Region in the United States, 1999 to 2020

**Supplementary Table 5.** Mortality trend among subgroups of congenital heart diseases under various ICD codes in the United States, 1999 to 2020

**Supplementary Table 6 .** Trends in Individual Congenital Heart Diseases mortality in the United States, 1999 to 2020

**Supplementary Figure 1.** Congenital Heart Disease Related Age-Adjusted Mortality Rates per 100,000, Stratified by Race in the United States, 1999 to 2020

**Supplementary Figure 2**. Congenital Heart Disease Related Age-Adjusted Mortality Rates per 100,000 in the United States Census Regions, 1999 to 2020

# **Supplementary Table 1**. Trends in Congenital Heart Disease Related Mortality Stratified by Place of Death in the United States, 1999 to 2020

| **Year** | **Total Deaths** | | | | | | |
| --- | --- | --- | --- | --- | --- | --- | --- |
| **Overall** | **Medical Facility - Inpatient** | **Medical Facility - Outpatient or ER** | **Medical Facility - Dead on Arrival** | **Decedent's home** | **Hospice facility** | **Other** |
| 1999 | 2802 | 2205 | 322 | 37 | 195 | Missing | 16 |
| 2000 | 2741 | 2216 | 294 | 27 | 159 | Missing | 19 |
| 2001 | 2649 | 2109 | 282 | 27 | 166 | Missing | 27 |
| 2002 | 2623 | 2051 | 288 | 37 | 198 | Missing | 18 |
| 2003 | 2564 | 2005 | 324 | 29 | 165 | 0 | 25 |
| 2004 | 2484 | 1982 | 288 | 30 | 148 | NA | 17 |
| 2005 | 2420 | 1909 | 271 | 22 | 181 | NA | 21 |
| 2006 | 2417 | 1931 | 274 | 17 | 155 | NA | 22 |
| 2007 | 2499 | 1925 | 319 | 31 | 190 | NA | 19 |
| 2008 | 2413 | 1908 | 287 | 19 | 171 | NA | 13 |
| 2009 | 2203 | 1659 | 264 | 14 | 158 | NA | 13 |
| 2010 | 2133 | 1701 | 243 | NA | 151 | NA | 17 |
| 2011 | 2142 | 1679 | 259 | 18 | 148 | 14 | 16 |
| 2012 | 2113 | 1648 | 234 | 14 | 170 | 23 | 13 |
| 2013 | 2078 | 1617 | 252 | 13 | 157 | 16 | 14 |
| 2014 | 1988 | 1589 | 202 | 11 | 143 | 17 | 19 |
| 2015 | 2079 | 1640 | 223 | 10 | 166 | 20 | 19 |
| 2016 | 2051 | 1617 | 216 | NA | 163 | 18 | 29 |
| 2017 | 1973 | 1579 | 199 | NA | 154 | 11 | 20 |
| 2018 | 1885 | 1505 | 192 | NA | 141 | 22 | 14 |
| 2019 | 1885 | 1464 | 194 | NA | 177 | 11 | 26 |
| 2020 | 1748 | 1365 | 170 | NA | 174 | 12 | 19 |
| **Total** | 49890 | 39304 | 5597 | 356 | 3630 | 164 | 416 |

#

**Supplementary Table 2.** Overall and Sex‐Stratified Congenital Heart Disease Related Age-Adjusted Mortality Rates per 100,000 in the United States, 1999 to 2019

| year | Age-Adjusted Rate (95% CI) | | |
| --- | --- | --- | --- |
| overall | male | female |
| 1999 | 4.7(4.6-4.9) | 4.8(4.6-5.1) | 4.6(4.3-4.8) |
| 2000 | 4.6(4.4-4.8) | 4.7(4.5-5.0) | 4.5(4.3-4.8) |
| 2001 | 4.3(4.1-4.4) | 4.4(4.2-4.7) | 4.1(3.9-4.4) |
| 2002 | 4.3(4.1-4.5) | 4.6(4.3-4.8) | 4.0(3.7-4.2) |
| 2003 | 4.2(4.0-4.4) | 4.4(4.1-4.6) | 4.0(3.7-4.2) |
| 2004 | 4.0(3.8-4.1) | 4.1(3.9-4.4) | 3.9(3.7-4.1) |
| 2005 | 3.9(3.7-4.1) | 4.0(3.8-4.2) | 3.7(3.5-4.0) |
| 2006 | 3.9(3.7-4.0) | 4.0(3.8-4.2) | 3.7(3.5-3.9) |
| 2007 | 3.9(3.8-4.1) | 3.9(3.7-4.2) | 3.9(3.7-4.1) |
| 2008 | 3.8(3.6-4.0) | 3.9(3.7-4.1) | 3.7(3.5-3.9) |
| 2009 | 3.5(3.4-3.7) | 3.7(3.5-3.9) | 3.4(3.2-3.6) |
| 2010 | 3.5(3.3-3.6) | 3.5(3.3-3.7) | 3.5(3.3-3.7) |
| 2011 | 3.4(3.3-3.6) | 3.6(3.3-3.8) | 3.3(3.1-3.5) |
| 2012 | 3.4(3.3-3.6) | 3.5(3.3-3.7) | 3.4(3.2-3.6) |
| 2013 | 3.4(3.2-3.5) | 3.5(3.3-3.7) | 3.2(3.0-3.4) |
| 2014 | 3.2(3.1-3.4) | 3.4(3.2-3.6) | 3.1(2.9-3.3) |
| 2015 | 3.3(3.2-3.5) | 3.5(3.3-3.7) | 3.3(3.1-3.5) |
| 2016 | 3.3(3.2-3.5) | 3.4(3.2-3.6) | 3.2(3.0-3.4) |
| 2017 | 3.2(3.1-3.4) | 3.2(3.0-3.4) | 3.2(3.0-3.4) |
| 2018 | 3.2(3.0-3.3) | 3.2(3.0-3.4) | 3.1(2.9-3.3) |
| 2019 | 3.2(3.0-3.3) | 3.2(3.0-3.4) | 3.1(2.9-3.3) |
| 2020 | 3.0(2.8-3.1) | 3.1(2.9-3.3) | 2.9(2.7-3.1) |

# **Supplementary Table 3.** Congenital Heart Disease Related Age-Adjusted Mortality Rates per 100,000, Stratified by Race in the United States, 1999 to 2019

| Year | Age-Adjusted Rate (95% CI) | | | | |
| --- | --- | --- | --- | --- | --- |
| American Indian or Alaska Native | Asian or Pacific Islander | Black or African American | White | Hispanic |
| 1999 | 5.6(3.8-7.9) | 3.4(2.7-4.3) | 6.0(5.5-6.5) | 4.4(4.2-4.6) | 4.7(4.3-5.1) |
| 2000 | 5.1(3.5-7.2) | 3.8(3.1-4.7) | 5.9(5.4-6.5) | 4.3(4.1-4.5) | 4.5(4.2-4.9) |
| 2001 | 5.5(3.8-7.6) | 3.3(2.6-4.0) | 5.7(5.2-6.2) | 4.0(3.8-4.2) | 4.0(3.7-4.4) |
| 2002 | 3.5(2.2-5.3) | 3.7(3.0-4.4) | 5.5(5.0-6.0) | 4.0(3.8-4.2) | 4.0(3.7-4.4) |
| 2003 | 5.8(4.0-8.0) | 3.3(2.7-4.0) | 5.3(4.8-5.8) | 3.8(3.6-4.0) | 4.2(3.8-4.5) |
| 2004 | 4.3(2.8-6.2) | 2.7(2.1-3.4) | 5.4(5.0-5.9) | 3.8(3.6-4.0) | 3.8(3.5-4.1) |
| 2005 | 5.5(3.8-7.7) | 2.8(2.2-3.4) | 4.8(4.3-5.2) | 3.7(3.5-3.9) | 3.9(3.6-4.2) |
| 2006 | 3.9(2.5-5.8) | 2.9(2.3-3.5) | 5.5(5.0-6.0) | 3.6(3.4-3.8) | 3.7(3.4-4.0) |
| 2007 | 4.2(2.8-6.1) | 3.1(2.5-3.8) | 5.5(5.0-5.9) | 3.6(3.4-3.8) | 3.8(3.5-4.1) |
| 2008 | 4.9(3.4-6.9) | 2.6(2.1-3.2) | 5.1(4.7-5.6) | 3.5(3.3-3.7) | 3.8(3.5-4.1) |
| 2009 | 4.0(2.6-5.9) | 3.2(2.6-3.8) | 4.8(4.3-5.2) | 3.3(3.1-3.5) | 3.4(3.1-3.7) |
| 2010 | 4.3(2.8-6.2) | 2.1(1.6-2.6) | 4.7(4.3-5.2) | 3.2(3.0-3.4) | 3.5(3.2-3.8) |
| 2011 | 5.2(3.6-7.3) | 2.8(2.2-3.4) | 4.3(3.9-4.8) | 3.2(3.0-3.4) | 3.4(3.1-3.7) |
| 2012 | 4.3(2.8-6.2) | 2.5(2.0-3.1) | 4.4(4.0-4.8) | 3.1(3.0-3.3) | 3.4(3.1-3.7) |
| 2013 | 3.7(2.3-5.5) | 2.6(2.1-3.2) | 4.4(4.0-4.8) | 3.1(2.9-3.3) | 3.4(3.1-3.7) |
| 2014 | 4.1(2.7-6.0) | 2.5(2.0-3.1) | 4.4(4.0-4.8) | 2.9(2.7-3.1) | 3.3(3.0-3.6) |
| 2015 | 4.4(2.9-6.4) | 2.4(1.9-3.0) | 4.6(4.2-5.0) | 3.1(2.9-3.3) | 3.3(3.0-3.6) |
| 2016 | 4.8(3.2-6.8) | 2.6(2.1-3.2) | 4.6(4.2-5.1) | 3.0(2.8-3.2) | 3.2(2.9-3.5) |
| 2017 | 4.6(3.0-6.6) | 2.8(2.3-3.4) | 4.3(3.9-4.7) | 2.9(2.7-3.1) | 3.3(3.0-3.6) |
| 2018 | 3.8(2.4-5.7) | 2.4(1.9-2.9) | 4.6(4.2-5.1) | 2.9(2.7-3.0) | 2.9(2.6-3.1) |
| 2019 | NA | 2.1(1.6-2.6) | 4.2(3.8-4.6) | 2.9(2.7-3.1) | 3.3(3.1-3.6) |
| 2020 | 4.2(2.6-6.3) | 2.4(1.9-2.9) | 4.0(3.6-4.4) | 2.8(2.6-3.0) | 2.9(2.6-3.1) |

# **Supplementary Table 4.** Congenital Heart Disease Related Age-Adjusted Mortality Rates per 100,000, Stratified by Region in the United States, 1999 to 2020

| **Year** | **Age-Adjusted Rate (95% CI)** | | | |
| --- | --- | --- | --- | --- |
| **Northeast** | **Midwest** | **South** | **West** |
| 1999 | 3.6(3.3-4.0) | 4.9(4.5-5.2) | 5.0(4.7-5.3) | 4.9(4.6-5.3) |
| 2000 | 3.6(3.3-4.0) | 4.8(4.4-5.2) | 4.9(4.6-5.2) | 4.8(4.5-5.2) |
| 2001 | 3.3(2.9-3.6) | 4.3(3.9-4.6) | 4.5(4.2-4.8) | 4.7(4.4-5.1) |
| 2002 | 3.2(2.8-3.5) | 4.6(4.2-4.9) | 4.5(4.2-4.8) | 4.4(4.1-4.8) |
| 2003 | 3.0(2.7-3.4) | 4.3(4.0-4.7) | 4.5(4.2-4.7) | 4.3(4.0-4.6) |
| 2004 | 3.3(2.9-3.6) | 4.3(3.9-4.6) | 4.2(3.9-4.5) | 4.0(3.7-4.3) |
| 2005 | 3.1(2.7-3.4) | 4.3(4.0-4.7) | 3.9(3.6-4.1) | 4.1(3.8-4.4) |
| 2006 | 3.3(2.9-3.6) | 4.0(3.7-4.4) | 4.2(3.9-4.5) | 3.7(3.4-4.0) |
| 2007 | 2.9(2.6-3.2) | 4.0(3.7-4.4) | 4.0(3.8-4.3) | 4.2(3.9-4.6) |
| 2008 | 3.4(3.0-3.8) | 3.8(3.5-4.1) | 3.8(3.6-4.1) | 4.0(3.6-4.3) |
| 2009 | 2.6(2.3-2.9) | 3.8(3.5-4.2) | 3.7(3.5-4.0) | 3.5(3.2-3.8) |
| 2010 | 2.7(2.3-3.0) | 3.7(3.4-4.0) | 3.7(3.4-3.9) | 3.5(3.2-3.8) |
| 2011 | 2.7(2.4-3.0) | 3.7(3.4-4.0) | 3.6(3.4-3.8) | 3.5(3.2-3.8) |
| 2012 | 2.7(2.3-3.0) | 3.6(3.2-3.9) | 3.7(3.5-3.9) | 3.4(3.1-3.7) |
| 2013 | 2.6(2.3-2.9) | 3.8(3.5-4.1) | 3.6(3.3-3.8) | 3.3(3.0-3.6) |
| 2014 | 2.4(2.1-2.7) | 3.4(3.0-3.7) | 3.6(3.3-3.8) | 3.2(2.9-3.5) |
| 2015 | 2.4(2.1-2.7) | 3.2(2.9-3.5) | 3.9(3.7-4.2) | 3.3(3.0-3.6) |
| 2016 | 2.1(1.8-2.3) | 3.5(3.2-3.8) | 3.9(3.6-4.1) | 3.1(2.8-3.3) |
| 2017 | 2.5(2.2-2.8) | 3.4(3.1-3.7) | 3.6(3.4-3.9) | 2.8(2.6-3.1) |
| 2018 | 2.4(2.1-2.7) | 3.6(3.3-3.9) | 3.4(3.2-3.6) | 2.8(2.5-3.0) |
| 2019 | 2.5(2.2-2.8) | 3.1(2.8-3.4) | 3.5(3.3-3.8) | 3.2(2.9-3.5) |
| 2020 | 2.1(1.8-2.4) | 3.2(2.8-3.5) | 3.4(3.1-3.6) | 2.8(2.6-3.1) |

# **Supplementary Table 5.** Mortality trend among subgroups of congenital heart diseases under various ICD codes in the United States, 1999 to 2020

| Year | Total Deaths | | | | | Total population |
| --- | --- | --- | --- | --- | --- | --- |
| ICD code q20 | ICD code Q-21 | ICD code Q-22 | ICD code Q-23 | ICD code Q-24 |
| 1999 | 269 | 547 | 111 | 583 | 1444 | 59955368 |
| 2000 | 255 | 503 | 100 | 595 | 1425 | 60253375 |
| 2001 | 242 | 494 | 99 | 568 | 1345 | 60450257 |
| 2002 | 233 | 519 | 106 | 510 | 1363 | 60563030 |
| 2003 | 218 | 493 | 111 | 517 | 1348 | 60628650 |
| 2004 | 205 | 483 | 104 | 496 | 1310 | 60651802 |
| 2005 | 206 | 476 | 79 | 510 | 1243 | 60519046 |
| 2006 | 208 | 468 | 103 | 476 | 1284 | 60516709 |
| 2007 | 226 | 430 | 93 | 511 | 1361 | 60681615 |
| 2008 | 193 | 495 | 89 | 467 | 1274 | 60907384 |
| 2009 | 178 | 381 | 91 | 456 | 1192 | 61087581 |
| 2010 | 174 | 409 | 72 | 411 | 1162 | 61227213 |
| 2011 | 171 | 406 | 84 | 430 | 1149 | 61201106 |
| 2012 | 199 | 378 | 99 | 430 | 1132 | 61144098 |
| 2013 | 201 | 416 | 82 | 430 | 1058 | 61089123 |
| 2014 | 186 | 386 | 75 | 419 | 1016 | 61067955 |
| 2015 | 173 | 392 | 91 | 433 | 1091 | 61016787 |
| 2016 | 191 | 472 | 92 | 437 | 980 | 60975069 |
| 2017 | 191 | 421 | 95 | 425 | 961 | 61021552 |
| 2018 | 159 | 411 | 92 | 344 | 980 | 60885444 |
| 2019 | 201 | 401 | 94 | 374 | 934 | 60570846 |
| 2020 | 163 | 407 | 71 | 329 | 884 | 60293426 |
| Total | 4442 | 9788 | 2,033 | 9,721 | 25,936 |  |

| ICD code Q-20= Congenital malformation of cardiac chambers and connections |
| --- |
| ICD code Q-21= Congenital malformation of cardiac septa |
| ICD code Q-22=congenital malformation of pulmonary and tricuspid valve |
| ICD code Q-23= Congenital malformation of aortic and mitral valve |
| ICD Code Q-24= Other congenital malformation eg dextrocardia |

# **Supplementary Table 6.** Trends in Individual Congenital Heart Diseases Related mortality in the United States, 1999-2020

| Year | Total Deaths | | | | | | Total population |
| --- | --- | --- | --- | --- | --- | --- | --- |
| VSD | ASD | AVSD | TOF | EA | MOCV |
| 1999 | 206 | 79 | 98 | 183 | 40 | 60 | 59955368 |
| 2000 | 199 | 79 | 96 | 152 | 40 | 46 | 60253375 |
| 2001 | 178 | 79 | 86 | 172 | 38 | 42 | 60450257 |
| 2002 | 188 | 100 | 112 | 163 | 35 | 49 | 60563030 |
| 2003 | 164 | 95 | 92 | 162 | 47 | 52 | 60628650 |
| 2004 | 177 | 75 | 83 | 162 | 37 | 48 | 60651802 |
| 2005 | 166 | 83 | 98 | 152 | 37 | 41 | 60519046 |
| 2006 | 172 | 76 | 81 | 163 | 41 | 43 | 60516709 |
| 2007 | 153 | 72 | 77 | 144 | 38 | 65 | 60681615 |
| 2008 | 179 | 71 | 87 | 175 | 39 | 54 | 60907384 |
| 2009 | 139 | 68 | 68 | 116 | 39 | 39 | 61087581 |
| 2010 | 133 | 73 | 74 | 144 | 30 | 23 | 61227213 |
| 2011 | 146 | 71 | 81 | 132 | 29 | 45 | 61201106 |
| 2012 | 120 | 72 | 90 | 110 | 30 | 35 | 61144098 |
| 2013 | 119 | 81 | 99 | 142 | 22 | 35 | 61089123 |
| 2014 | 128 | 63 | 96 | 118 | 25 | 43 | 61067955 |
| 2015 | 130 | 67 | 93 | 123 | 36 | 42 | 61016787 |
| 2016 | 174 | 74 | 115 | 133 | 26 | 42 | 60975069 |
| 2017 | 136 | 71 | 108 | 125 | 30 | 33 | 61021552 |
| 2018 | 141 | 57 | 103 | 128 | 36 | 24 | 60885444 |
| 2019 | 128 | 82 | 98 | 116 | 36 | 34 | 60570846 |
| 2020 | 158 | 72 | 85 | 110 | 20 | 23 | 60293426 |
| **Total** | 3434 | 1660 | 2020 | 3125 | 751 | 918 |  |

VSD= Ventricular Septal Defect

ASD= Atrial Septal Defect

AVSD= Atrioventricular Septal Defect

TOF= Tetralogy of Fallot

EA= Ebstein Anomaly

MOCV= Malformation of Coronary Vessels

**Supplementary Figure 1.** Congenital Heart Disease Related Age-Adjusted Mortality Rates per 100,000, Stratified by Race in the United States, 1999 to 2020


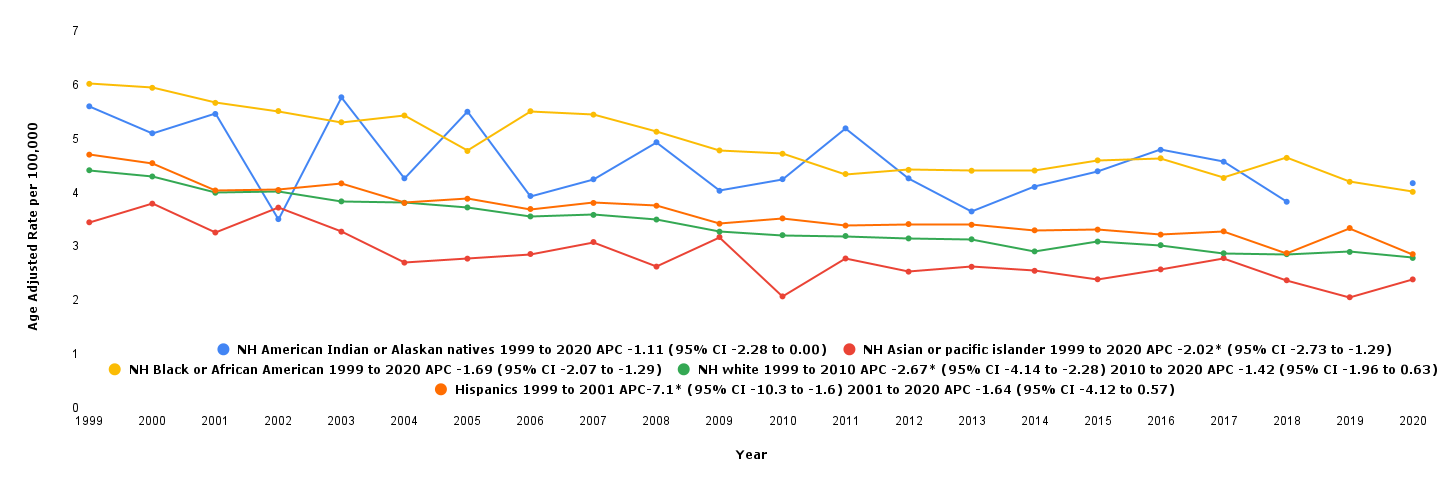


# **Supplementary Figure 2.** Congenital Heart Disease-related Age-Adjusted Mortality Rates per 100,000 in the United States Census Regions, 1999-2020


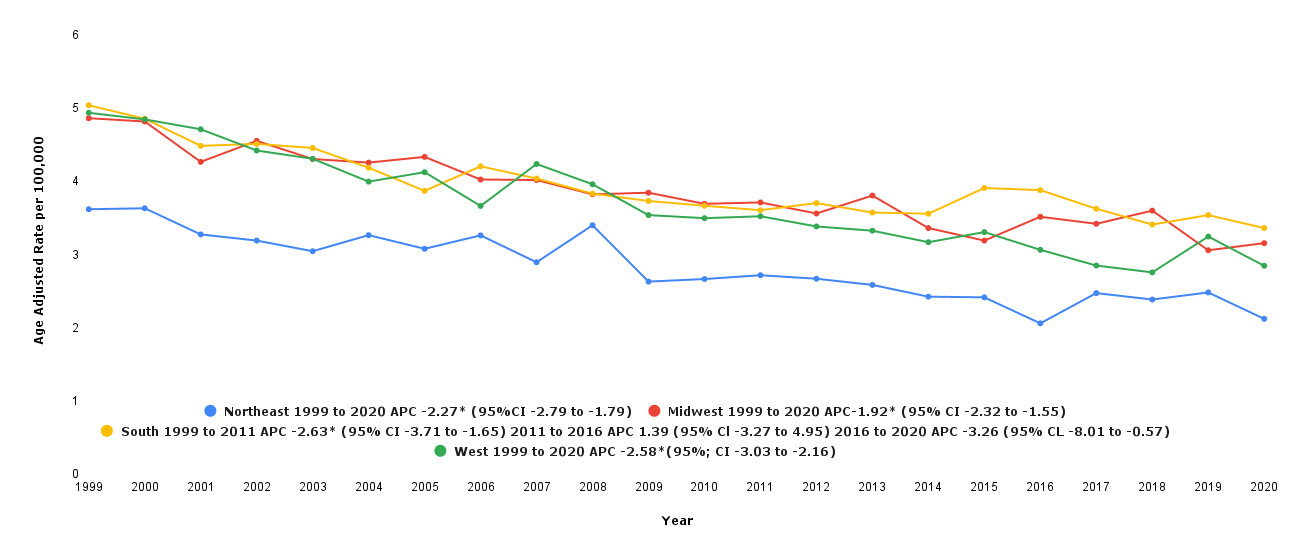

Supplement: Supplementary file 1 [file 6a2e993f971438c2972f73fe.docx]
